# Supplementary material for: Identification of the optic recess region as a morphogenetic entity in the zebrafish forebrain
Source: PubMed Central journal article supplement (PMC5390081; doi:10.1038/srep08738), 2015-03-04
Supplement: srep08738-s2.pdf [file srep08738-s2.pdf]

# **Identification of the optic recess region as a morphogenetic entity in the zebrafish forebrain**

Pierre Affaticati<sup>1\*</sup>, Kei Yamamoto<sup>1\*</sup>, Barbara Rizzi<sup>2</sup>, Charlotte Bureau<sup>1</sup>, Nadine Peyri ras<sup>2</sup>, Catherine Pasqualini<sup>1</sup>, Micha l Demarque<sup>1#</sup>, and Philippe Vernier<sup>1#</sup>

Unit Neurobiology & Development (UPR3294), Institute of Neurobiology Alfred Fessard,  
CNRS; Avenue de la Terrasse, 91190 Gif-sur-Yvette, France

**Supplementary material: interactive PDF file**

Reference views :

A

B

C

D

**Supplementary Material 1. Interactive PDF file demonstrating ventricular morphology.**

3D interactive surface rendering representation of segmented ventricle (in opacity) and forebrain (in transparency) of zebrafish embryos at 24, 30, 48 hpf. Each figure can be rotated, zoomed and translated independently. **A-C**: Dorsal, frontal, lateral, ventral views at 24 (A), 30 (B), 48 (C) hpf. Clickable buttons allow simultaneously changing the views. **D**: Same images as in A-C at higher magnification, with lower buttons for choosing the stage to be displayed. On the bottom left is shown the reference of the original confocal image. Mouse left-click to rotate, right click to zoom in and out, both to translate. Abbreviations: Hyp: hypothalamus, ORR: optic recess region, Tel: telencephalon.
